# Supplementary material for: Effects of potassium permanganate conditioning on dewatering and rheological behavior of pulping activated sludge: mechanism and feasibility
Source: Royal Society of Chemistry journal article supplement (doi:10.1039/c8ra07822j), 2018-01-01
Supplement: c8ra07822j1.pdf [file c8ra07822j1.pdf]

|                                    |   |          |        |         |        |          |          |          |         |         |         |         |         |          |          |         |         |
|------------------------------------|---|----------|--------|---------|--------|----------|----------|----------|---------|---------|---------|---------|---------|----------|----------|---------|---------|
| Total EPS                          | R | 0.717    | 0.304  | 0.933** | 0.850* | 0.999**  | 0.987**  | 1        | -0.311  | -0.477  | -0.465  | -0.482  | -0.406  | -0.966** | 0.814*   | -0.527  | -0.650  |
|                                    | P | 0.109    | 0.558  | 0.007   | 0.032  | 0.000    | 0.000    |          | 0.549   | 0.339   | 0.352   | 0.334   | 0.424   | 0.002    | 0.049    | 0.282   | 0.163   |
|                                    | N | 6        | 6      | 6       | 6      | 6        | 6        | 6        | 6       | 6       | 6       | 6       | 6       | 6        | 6        | 6       | 6       |
| SRT                                | R | -0.763   | 0.050  | -0.253  | -0.352 | -0.273   | -0.455   | -0.311   | 1       | 0.922** | 0.957** | 0.930*  | 0.959** | 0.237    | -0.061   | 0.911*  | 0.839*  |
|                                    | P | 0.078    | 0.925  | 0.628   | 0.494  | 0.601    | 0.365    | 0.549    |         | 0.009   | 0.003   | 0.007   | 0.002   | 0.652    | 0.909    | 0.011   | 0.037   |
|                                    | N | 6        | 6      | 6       | 6      | 6        | 6        | 6        | 6       | 6       | 6       | 6       | 6       | 6        | 6        | 6       | 6       |
| TTF                                | R | -0.725   | -0.100 | -0.453  | -0.402 | -0.441   | -0.609   | -0.477   | 0.922** | 1       | 0.988** | 0.809   | 0.880*  | 0.434    | -0.328   | 0.868*  | .971**  |
|                                    | P | 0.103    | 0.850  | 0.367   | 0.429  | 0.382    | 0.199    | 0.339    | 0.009   |         | 0.000   | 0.051   | 0.021   | 0.389    | 0.525    | 0.025   | 0.001   |
|                                    | N | 6        | 6      | 6       | 6      | 6        | 6        | 6        | 6       | 6       | 6       | 6       | 6       | 6        | 6        | 6       | 6       |
| Moisture rate<br>of sludge<br>cake | R | -0.794   | -0.065 | -0.452  | -0.383 | -0.428   | -0.600   | -0.465   | 0.957** | 0.988** | 1       | 0.855*  | 0.918** | 0.420    | -0.298   | 0.916*  | 0.956** |
|                                    | P | 0.059    | 0.902  | 0.368   | 0.453  | 0.397    | 0.208    | 0.352    | 0.003   | 0.000   |         | 0.030   | 0.010   | 0.407    | 0.566    | 0.010   | 0.003   |
|                                    | N | 6        | 6      | 6       | 6      | 6        | 6        | 6        | 6       | 6       | 6       | 6       | 6       | 6        | 6        | 6       | 6       |
| Bound water                        | R | -0.841*  | 0.094  | -0.353  | -0.611 | -0.453   | -0.593   | -0.482   | 0.930*  | 0.809   | 0.855*  | 1       | 0.954** | 0.361    | 0.082    | 0.909*  | 0.759   |
|                                    | P | 0.036    | 0.860  | 0.492   | 0.198  | 0.367    | 0.214    | 0.334    | 0.007   | 0.051   | 0.030   |         | 0.003   | 0.482    | 0.877    | 0.012   | 0.080   |
|                                    | N | 6        | 6      | 6       | 6      | 6        | 6        | 6        | 6       | 6       | 6       | 6       | 6       | 6        | 6        | 6       | 6       |
| $\tau_y$                           | R | -0.837*  | 0.251  | -0.370  | -0.441 | -0.372   | -0.532   | -0.406   | 0.959** | 0.880*  | 0.918** | 0.954** | 1       | 0.273    | -0.035   | 0.971** | 0.827*  |
|                                    | P | 0.038    | 0.631  | 0.470   | 0.381  | 0.468    | 0.277    | 0.424    | 0.002   | 0.021   | 0.010   | 0.003   |         | 0.601    | 0.947    | 0.001   | 0.042   |
|                                    | N | 6        | 6      | 6       | 6      | 6        | 6        | 6        | 6       | 6       | 6       | 6       | 6       | 6        | 6        | 6       | 6       |
| $k$                                | R | -0.633   | -0.517 | -0.908* | -0.763 | -0.967** | -0.948** | -0.966** | 0.237   | 0.434   | 0.420   | 0.361   | 0.273   | 1.000    | -0.928** | 0.410   | 0.615   |
|                                    | P | 0.178    | 0.294  | 0.012   | 0.077  | 0.002    | 0.004    | 0.002    | 0.652   | 0.389   | 0.407   | 0.482   | 0.601   |          | 0.008    | 0.419   | 0.194   |
|                                    | N | 6        | 6      | 6       | 6      | 6        | 6        | 6        | 6       | 6       | 6       | 6       | 6       | 6        | 6        | 6       | 6       |
| $n$                                | R | 0.420    | 0.676  | 0.823*  | 0.498  | 0.815*   | 0.786    | 0.814*   | -0.061  | -0.328  | -0.298  | 0.082   | -0.035  | -0.928** | 1        | -0.196  | -0.516  |
|                                    | P | 0.407    | 0.141  | 0.044   | 0.315  | 0.048    | 0.064    | 0.049    | 0.909   | 0.525   | 0.566   | 0.877   | 0.947   | 0.008    |          | 0.709   | 0.295   |
|                                    | N | 6        | 6      | 6       | 6      | 6        | 6        | 6        | 6       | 6       | 6       | 6       | 6       | 6        | 6        | 6       | 6       |
| steady state<br>viscosity          | R | -0.928** | 0.220  | -0.546  | -0.446 | -0.494   | -0.636   | -0.527   | 0.911*  | 0.868*  | 0.916*  | 0.909*  | 0.971** | 0.410    | -0.196   | 1       | 0.865*  |
|                                    | P | 0.008    | 0.675  | 0.262   | 0.375  | 0.319    | 0.174    | 0.282    | 0.011   | 0.025   | 0.010   | 0.012   | 0.001   | 0.419    | 0.709    |         | 0.026   |

|                    |   |        |        |        |        |        |        |        |        |         |         |       |        |       |        |        |   |
|--------------------|---|--------|--------|--------|--------|--------|--------|--------|--------|---------|---------|-------|--------|-------|--------|--------|---|
|                    | N | 6      | 6      | 6      | 6      | 6      | 6      | 6      | 6      | 6       | 6       | 6     | 6      | 6     | 6      | 6      | 6 |
| Hysteresis<br>area | R | -0.790 | -0.155 | -0.650 | -0.493 | -0.618 | -0.757 | -0.650 | 0.839* | 0.971** | 0.956** | 0.759 | 0.827* | 0.615 | -0.516 | 0.865* | 1 |
|                    | P | 0.062  | 0.769  | 0.163  | 0.320  | 0.191  | 0.081  | 0.163  | 0.037  | 0.001   | 0.003   | 0.080 | 0.042  | 0.194 | 0.295  | 0.026  |   |
|                    | N | 6      | 6      | 6      | 6      | 6      | 6      | 6      | 6      | 6       | 6       | 6     | 6      | 6     | 6      | 6      | 6 |

\*Correlation is significant at the 0.05 level (2-tailed). \*\*Correlation is significant at the 0.01 level (2-tailed).

N is the numbers of the sludge sample.
